# Supplementary material for: Photo-mediated co-loading of highly dispersed MnOx-Pt on g-C3N4 boosts the ambient catalytic oxidation of formaldehyde
Source: Royal Society of Chemistry journal article supplement (doi:10.1039/c8nr08731h), 2019-01-01
Supplement: c8nr08731h1.pdf [file c8nr08731h1.pdf]

## *Supplementary Material*

# **Photo-mediated co-loading of highly dispersed MnO<sub>x</sub>-Pt on g-C<sub>3</sub>N<sub>4</sub> boosts the ambient catalytic oxidation of formaldehyde**

*Lianjie Duan<sup>a,b,#</sup>, Huan Liu<sup>a,b,#</sup>, Muhammad Yaseen<sup>c</sup>, Liyi Shi<sup>a</sup>, Haocheng Wu<sup>a</sup>,  
Jiangping Zhang<sup>a</sup>, Dongqi Yu<sup>b</sup> and Lei Huang<sup>a\*</sup>*

<sup>a</sup> Research Center of Nano Science and Technology, Shanghai University, Shanghai 200444, P. R. China.

<sup>b</sup> School of Physics and Electronic Technology, Liaoning Normal University, Dalian 116029, China.

<sup>c</sup> Institute of Chemical Sciences, University of Peshawar, Peshawar, 25120, KP, Pakistan.

# These authors contributed equally to this work

\*To whom correspondence should be addressed: Tel: +86-21-66134726; E-mail: leihuang@shu.edu.cn (L. Huang)

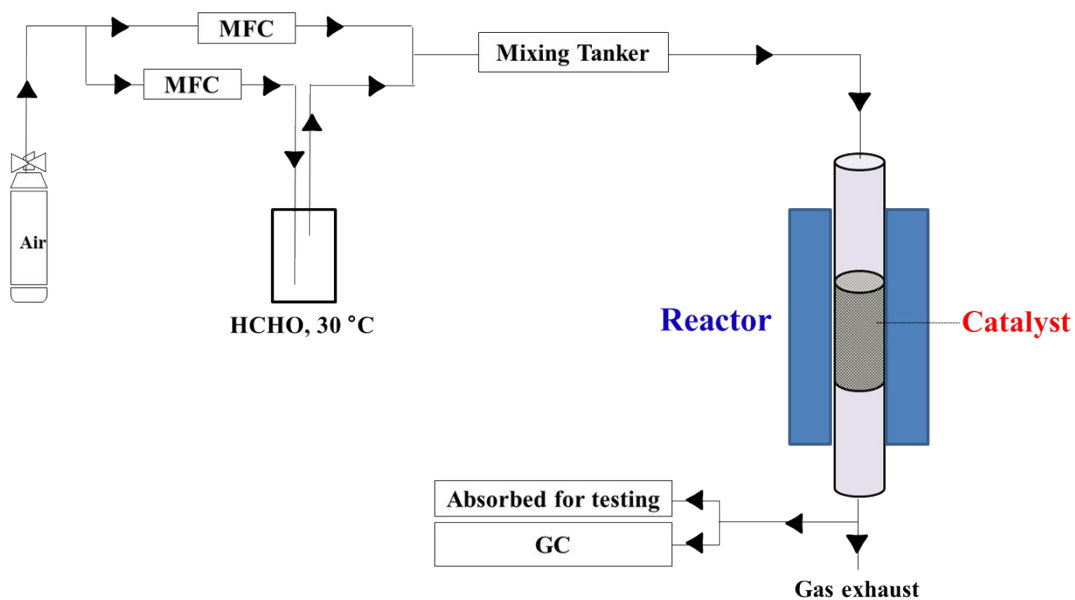

**Fig. S1** Schematic representation of experimental setup for catalytic oxidation of HCHO.

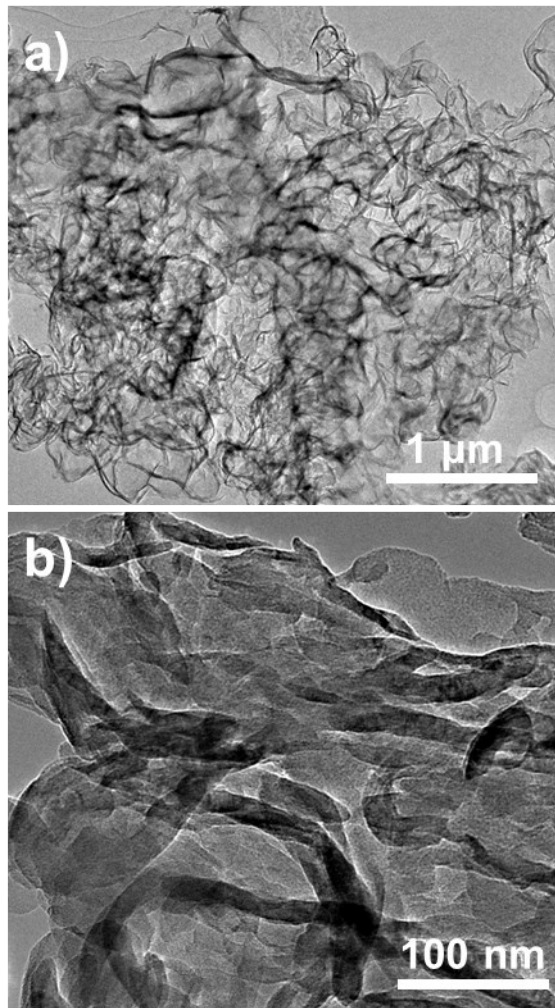

**Fig. S2** Field-emission TEM images of g-C<sub>3</sub>N<sub>4</sub>.

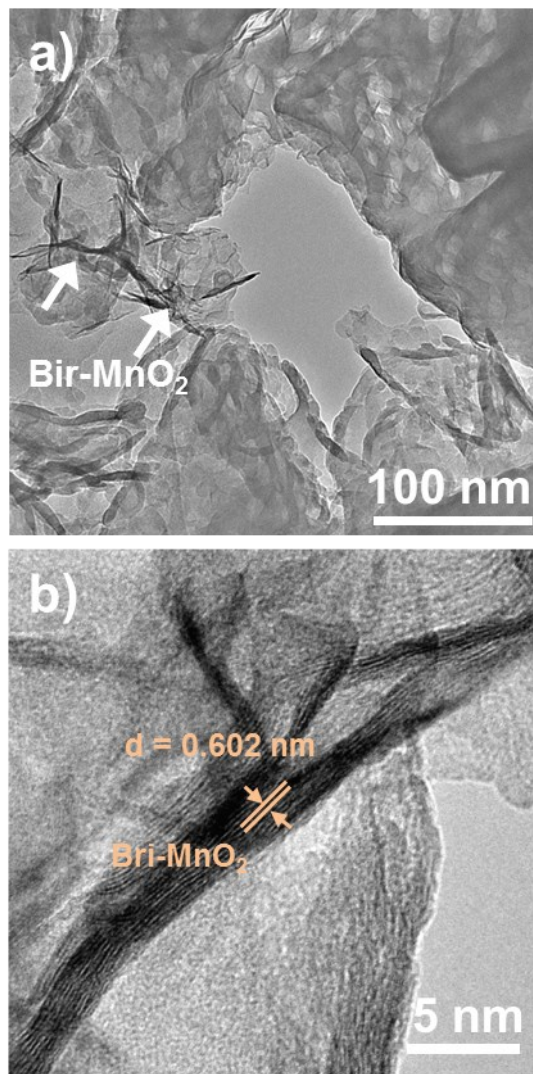

**Fig. S3** Field-emission TEM and HRTEM images of MnO<sub>x</sub>/g-C<sub>3</sub>N<sub>4</sub>.

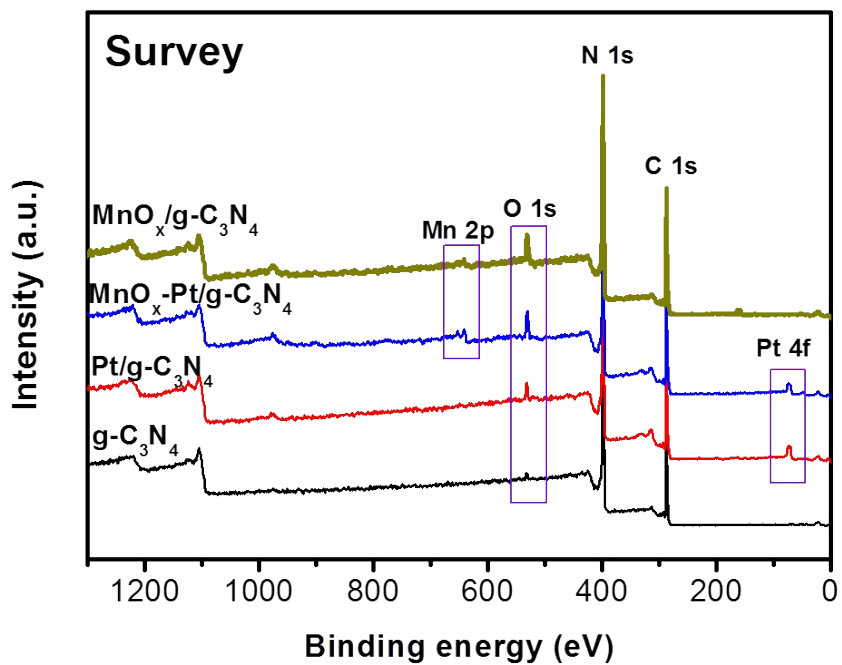

Fig. S4 XPS spectra of survey for various catalysts.

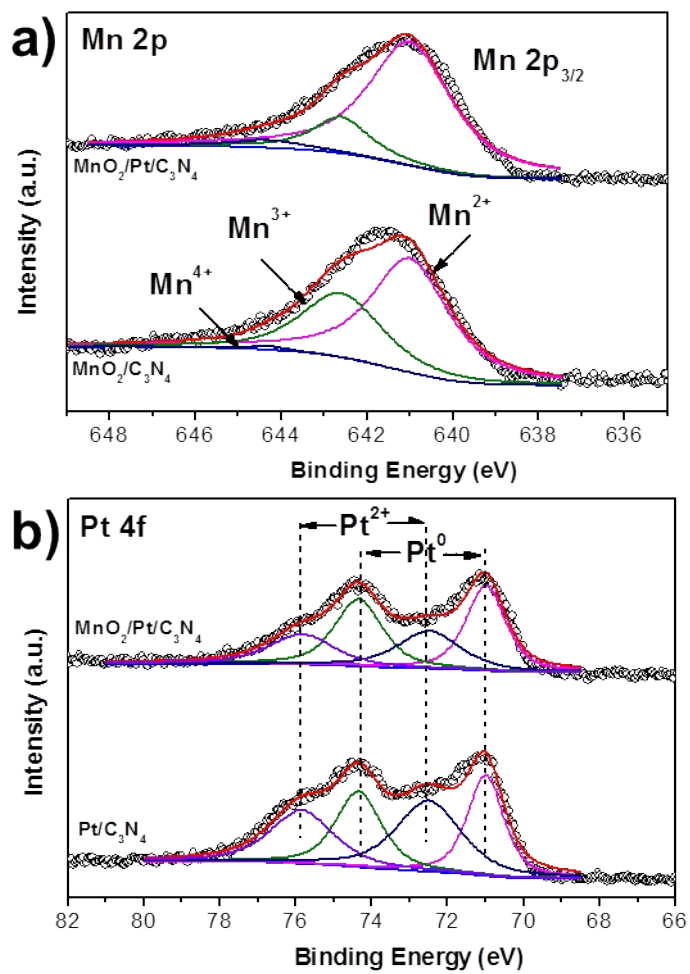

Fig. S. XPS spectra of Mn 2p (a) and Pt 4f (b) of various catalysts.

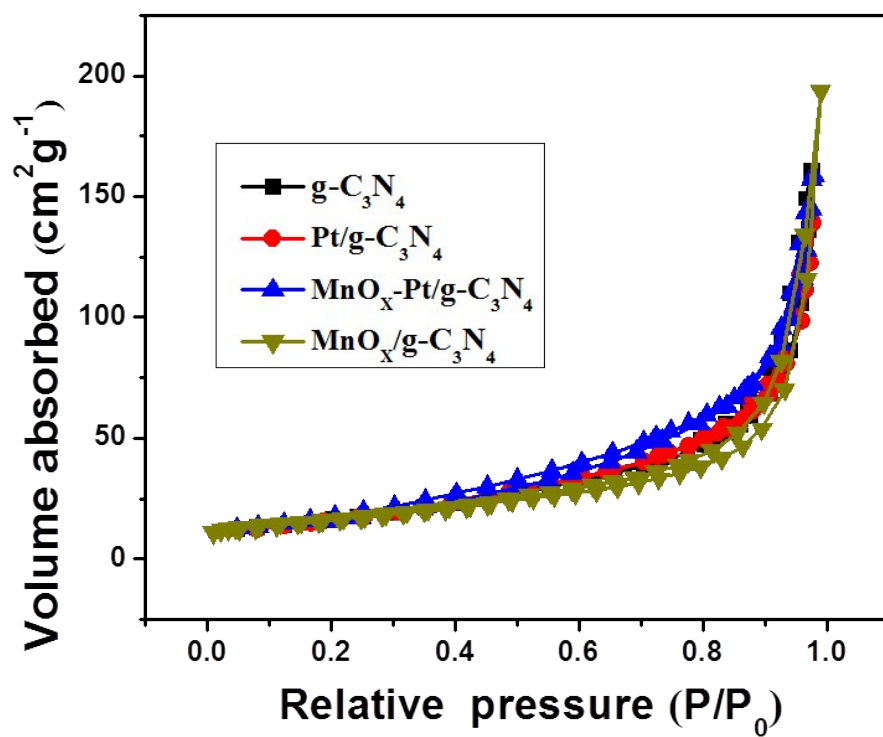

**Fig. S6** N<sub>2</sub> adsorption-desorption isotherms of g-C<sub>3</sub>N<sub>4</sub>, Pt/g-C<sub>3</sub>N<sub>4</sub>, MnO<sub>x</sub>-Pt/g-C<sub>3</sub>N<sub>4</sub> and MnO<sub>x</sub>/g-C<sub>3</sub>N<sub>4</sub>.

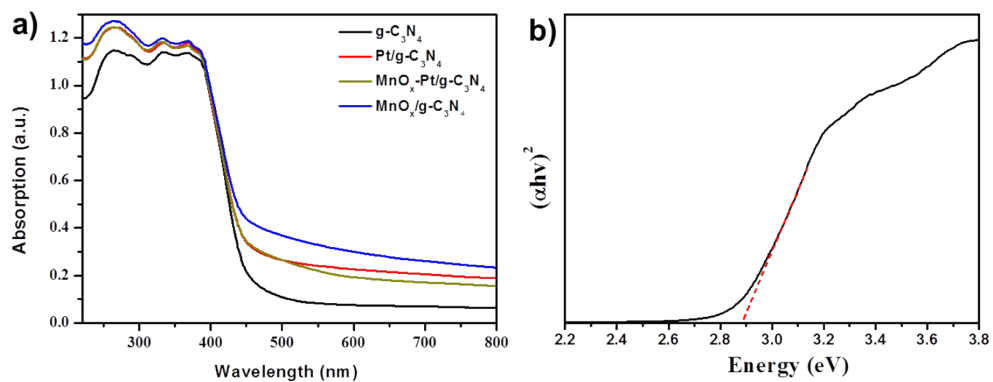

**Fig. S7** (a) is UV-vis diffusion absorption spectra of  $g\text{-C}_3\text{N}_4$ ,  $\text{Pt}/g\text{-C}_3\text{N}_4$ ,  $\text{MnO}_x\text{-Pt}/g\text{-C}_3\text{N}_4$  and  $\text{MnO}_x/g\text{-C}_3\text{N}_4$ . (b) is the plots of the  $(\alpha h\nu)^2$  versus photon energy ( $h\nu$ ).



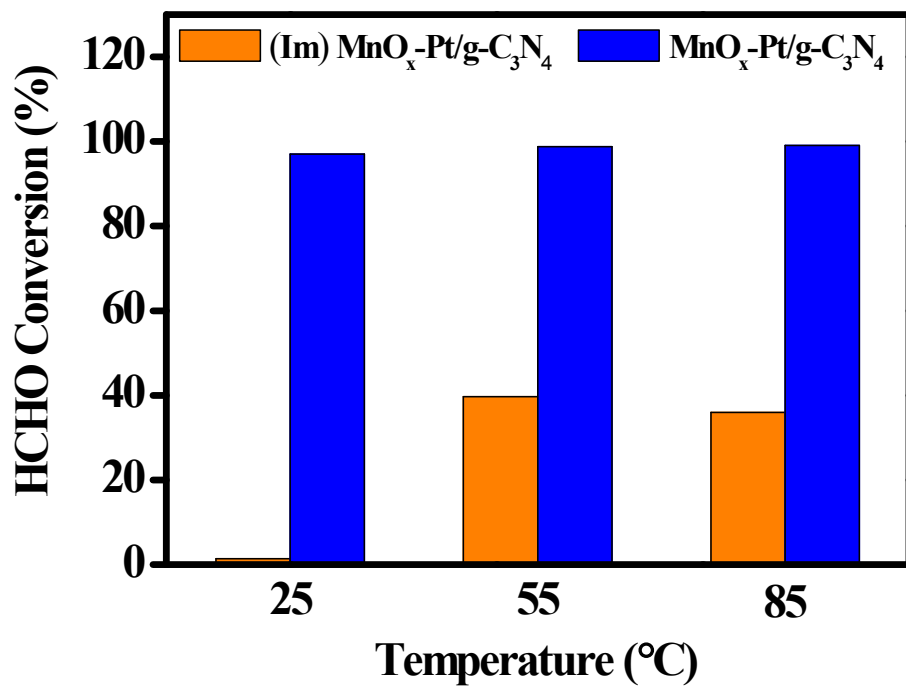

Fig. S8 HCHO conversion over MnO<sub>x</sub>-Pt/g-C<sub>3</sub>N<sub>4</sub> and (Im)MnO<sub>x</sub>-Pt/g-C<sub>3</sub>N<sub>4</sub>.
